# Supplementary material for: Magnetic resonance imaging of placental intralobule structure and function in a preclinical nonhuman primate model
Source: PubMed Central journal article supplement — Biol Reprod. 2024 Mar 5;110(6):1065–76. doi: 10.1093/biolre/ioae035 (PMC11180614; doi:10.1093/biolre/ioae035), 2024-03-05
Supplement: supplemental_figure_s1_ioae035.pdf [file supplemental_figure_s1_ioae035.pdf]

A

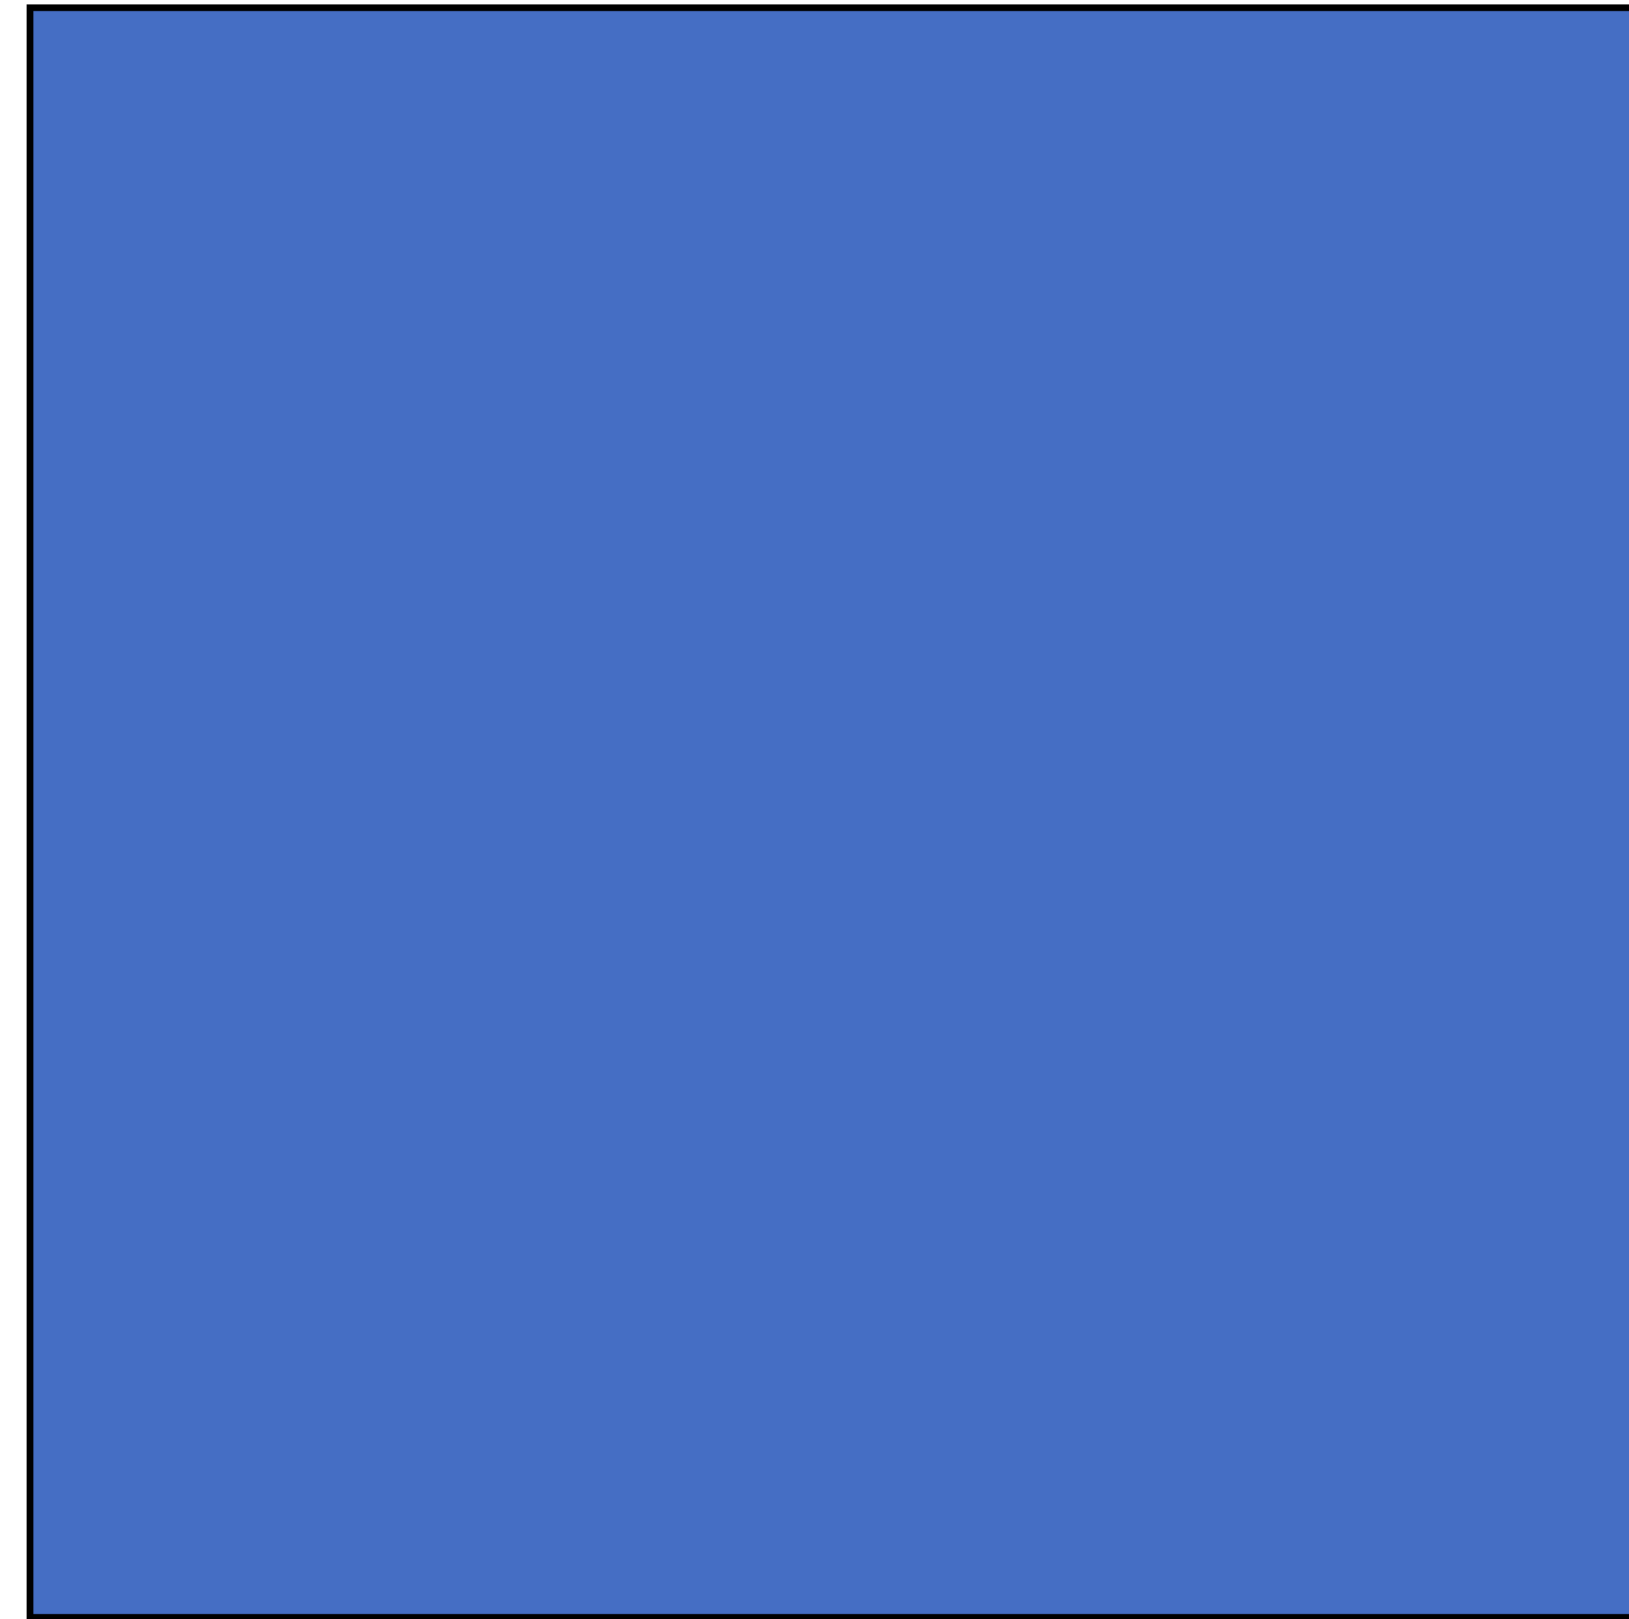

B

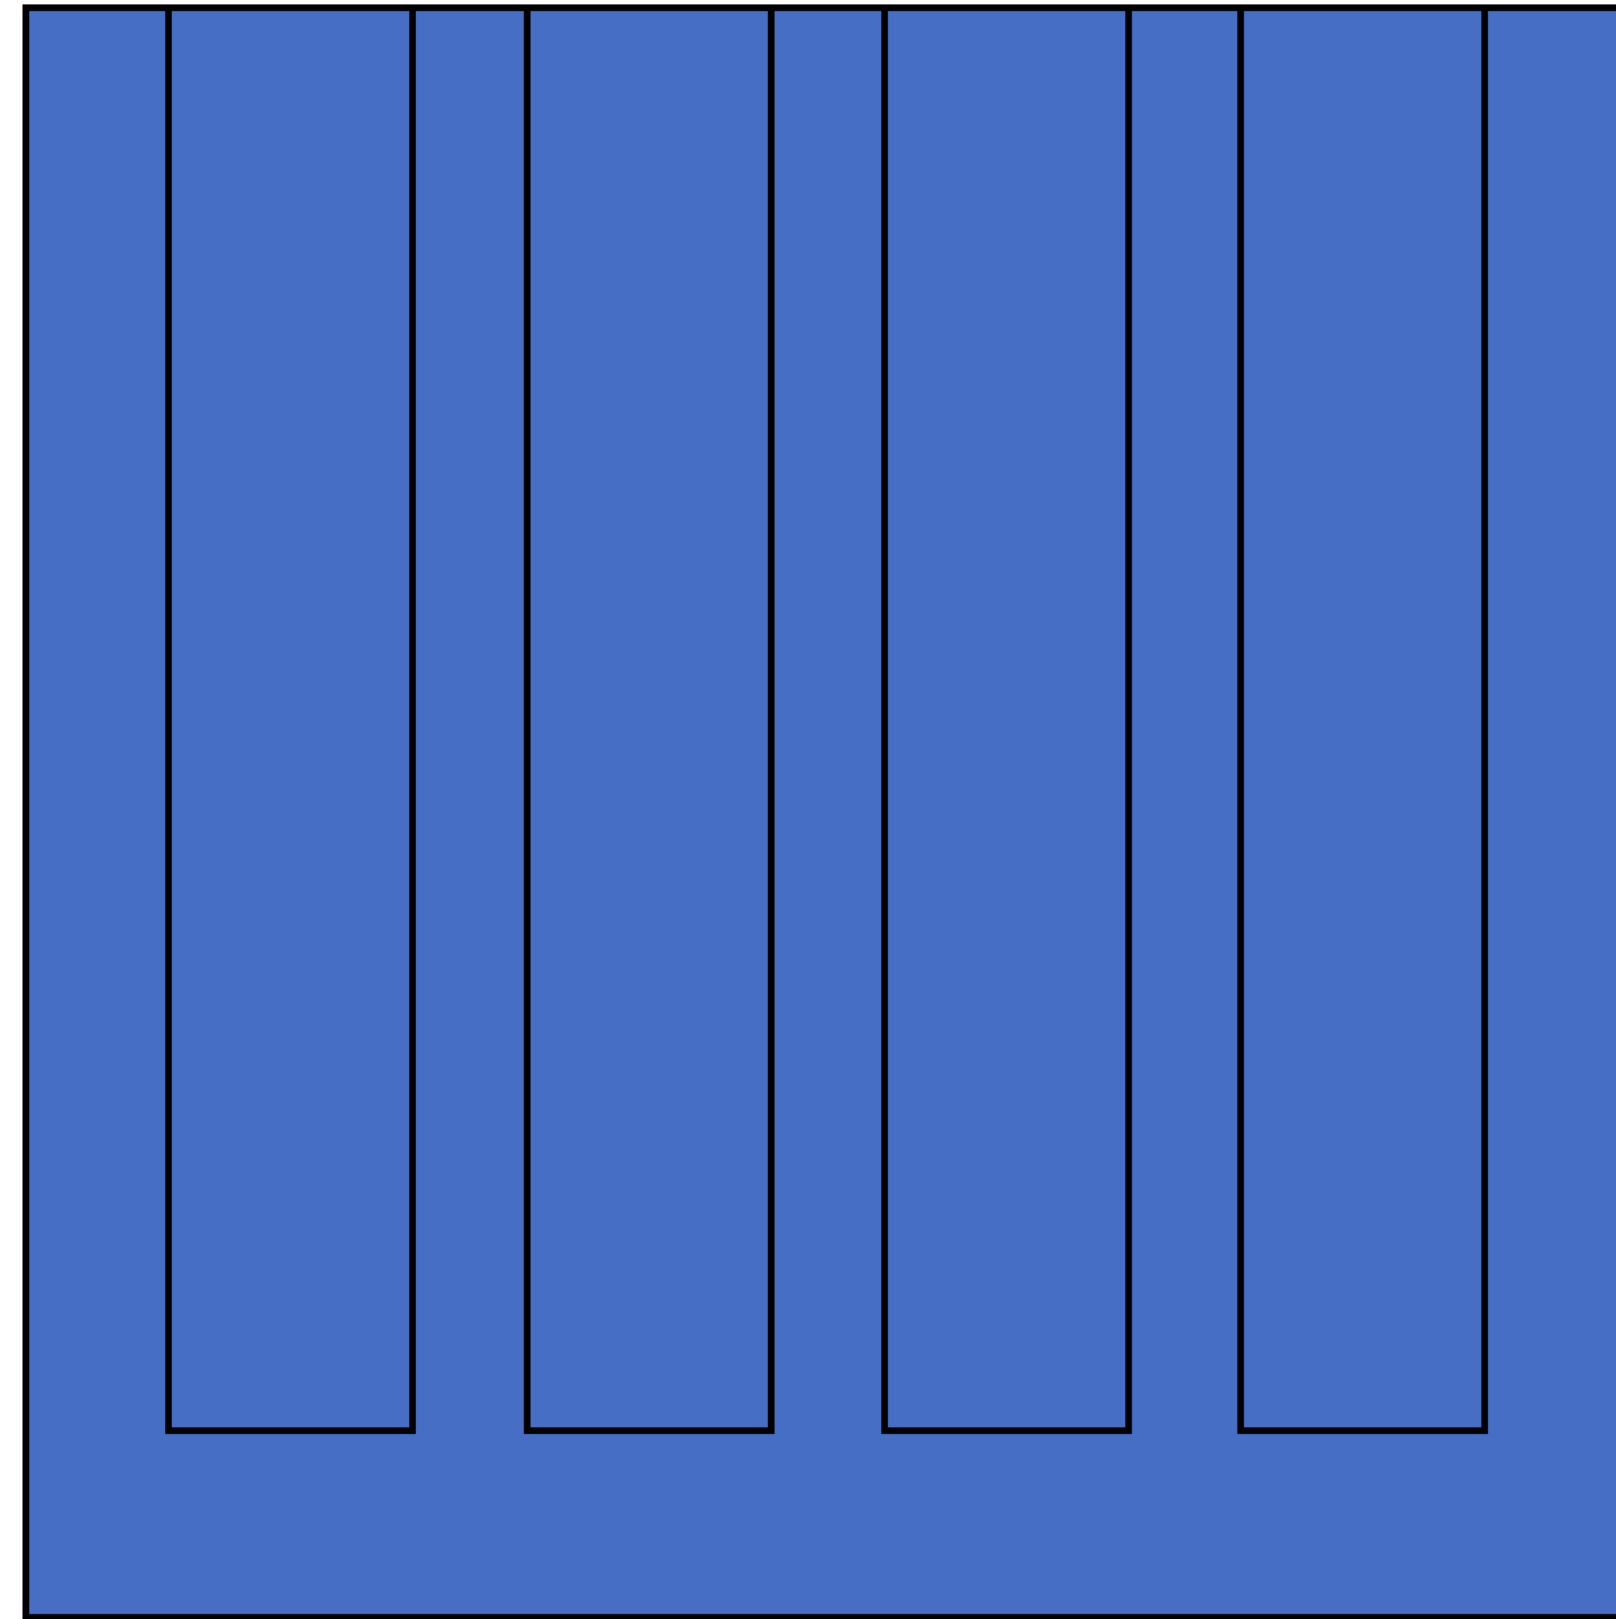

C

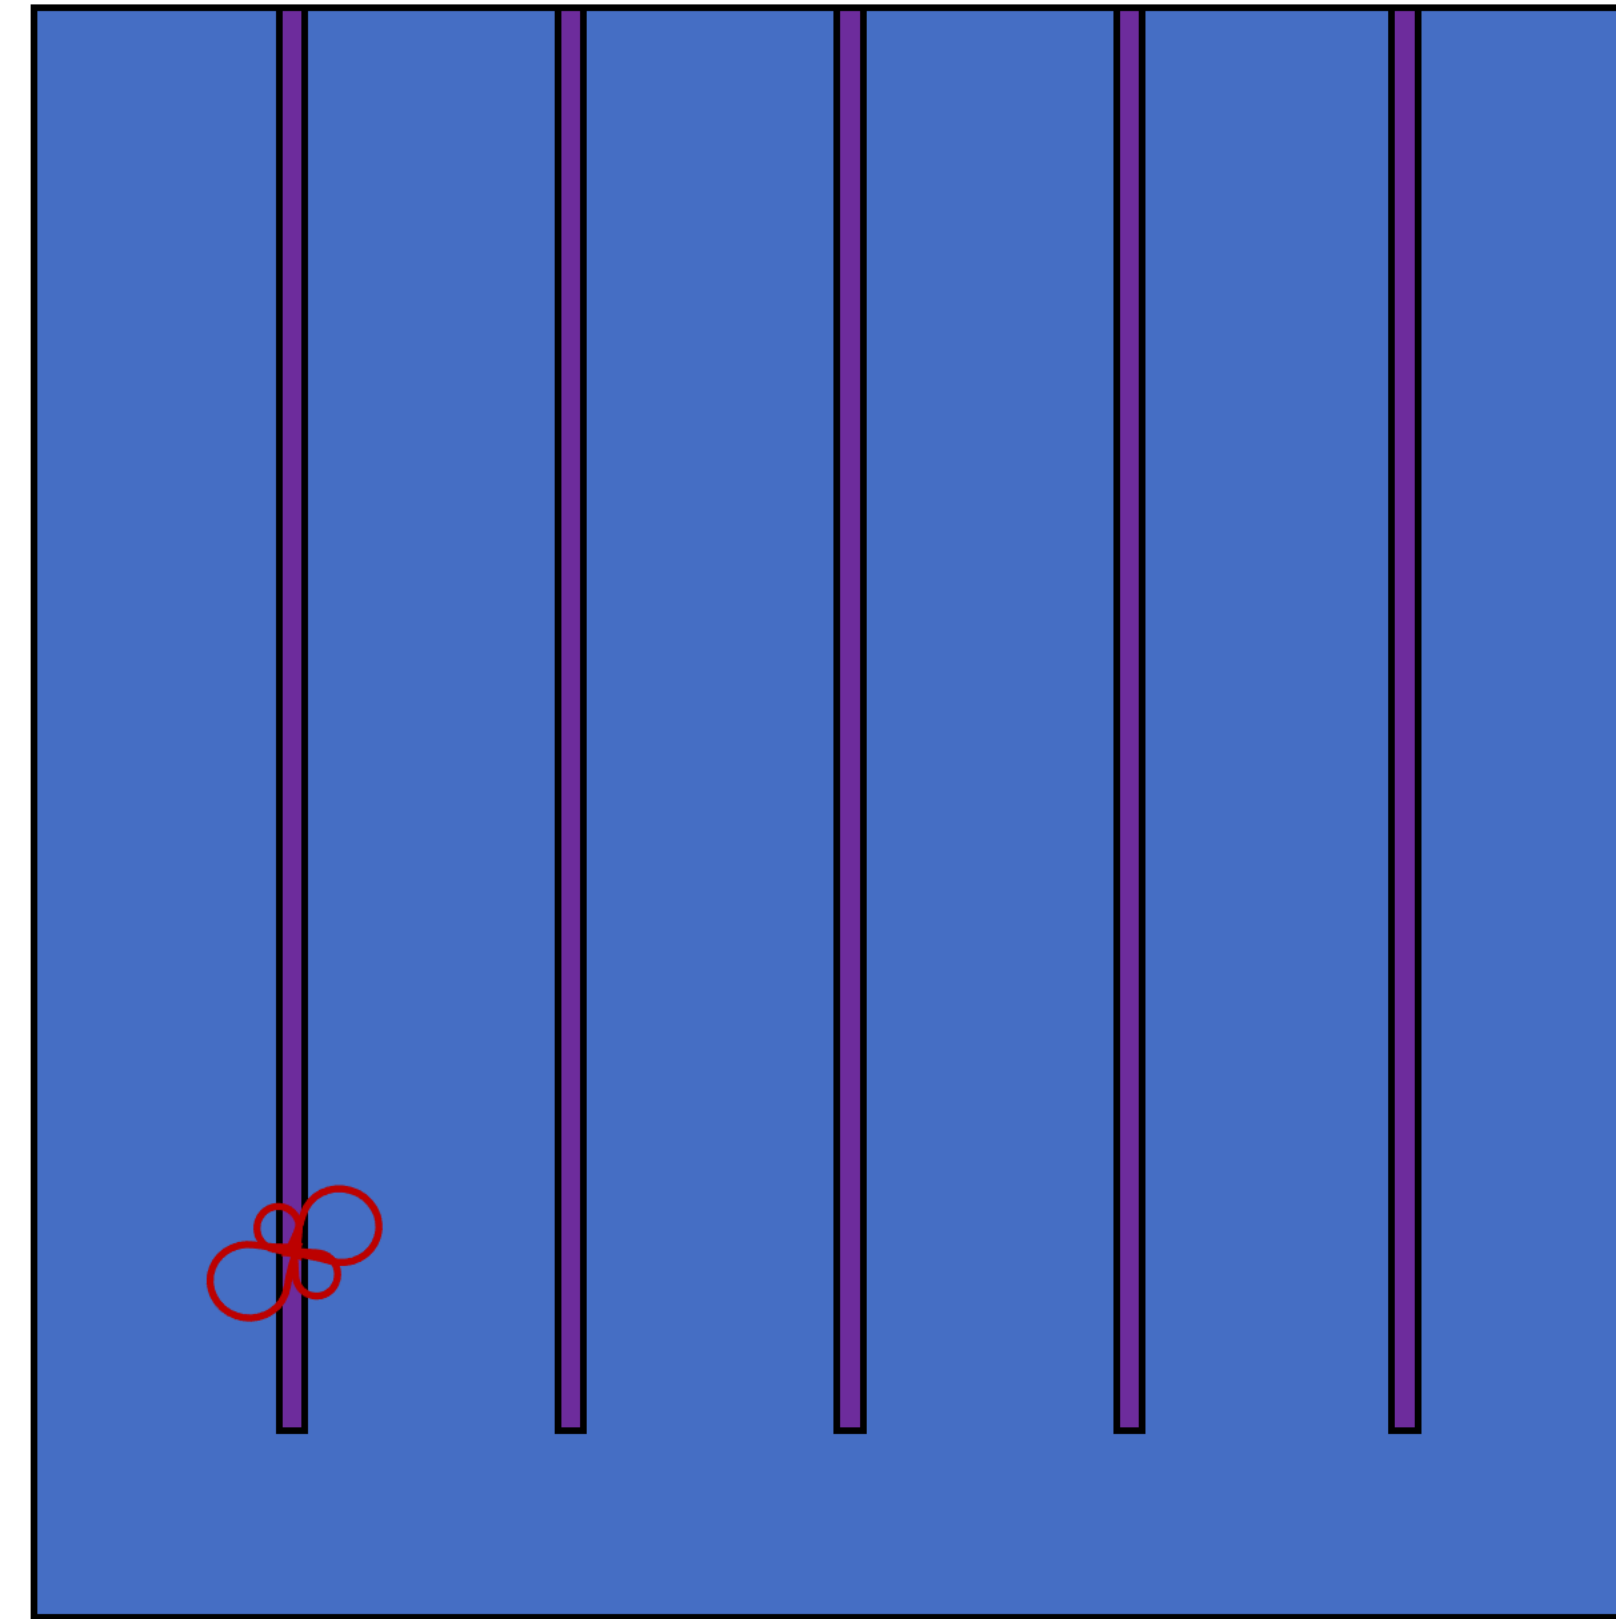

D

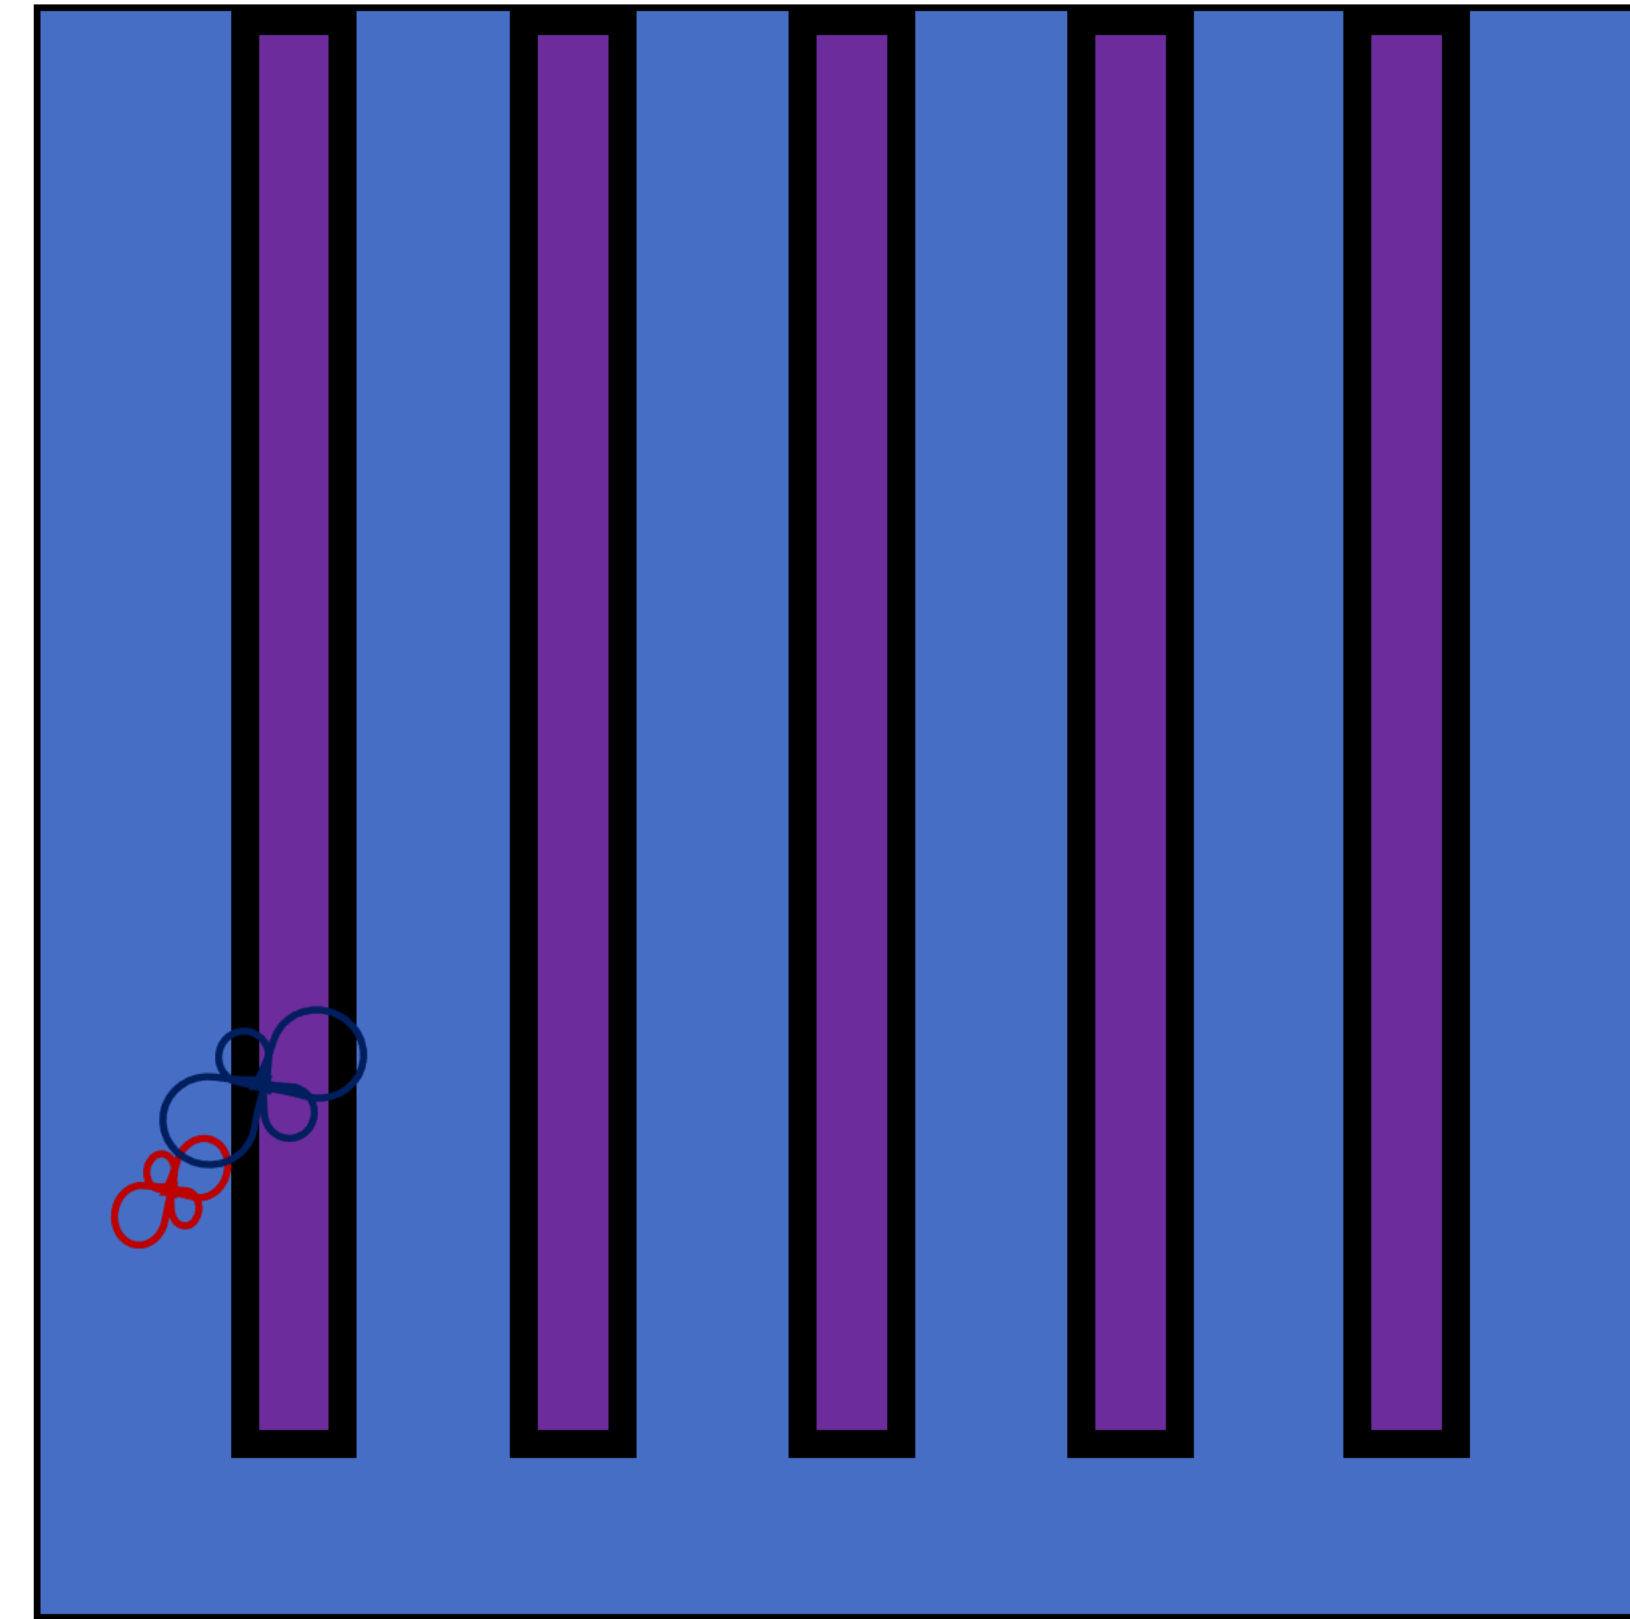

A pure fluid pool in a  
homogenous magnetic  
field  
 $T2 = T2^*$

Macromolecular  
projections (villi) increase  
irreversible dephasing at  
boundaries  
 $T2$  and  $T2^*$  reduce

Villous projections cause a  
static local susceptibility  
difference (reversible  
dephasing) as well as  
causing irreversible  
dephasing  
 $T2$  and  $T2^*$  reduce  
differentially

Large susceptibility  
differences caused by low  
inter-villous saturation  
extend into the fluid pool,  
enhancing reversible  
dephasing  
*Enhanced  $T2^*$  reduction in  
placental tissue based on  
fetal  $O_2$  saturation.*
